# Supplementary material for: Looking at the Molecular Target of NS5A Inhibitors throughout a Population Highly Affected with Hepatitis C Virus
Source: Pathogens. 2023 May 24;12(6):754. doi: 10.3390/pathogens12060754 (PMC10302339; doi:10.3390/pathogens12060754)
Supplement: Supplementary file 1 [file pathogens-12-00754-s001.zip › Pathogens_supplementary _table_S1_NS5AHCV_09_02.xlsx]

## Sheet: Folha1
Supplementary Table S1
Looking at the Molecular Target of NS5A inhibitors throughout a Population Highly Affected with Hepatitis C Virus
Diogo Ramos1, Miguel Pinto2, Rodrigo Sousa Coutinho3, Carolina Silva1, Miriam Quina1, João Paulo Gomes2 and Elizabeth Pádua1*
1 Reference Laboratory of HIV and Hepatitis B and C, Department of Infectious Diseases, National Institute of Health, Av. Padre Cruz, P-1649-016 Lisbon, Portugal
2 Genomics and Bioinformatics Unit, Department of Infectious Diseases, National Institute of Health, Av. Padre Cruz, P-1649-016 Lisbon, Portugal
3 Association Ares do Pinhal, Association for the Rehabilitation of Drug Addicts, Low-Threshold Methadone Substitution Program, R. José Inácio Andrade, Loja 2 – A6 – 10B Quinta do Lavrado, P-1900-418 Lisbon, Portugal
*Corresponding author: elizabeth.padua@insa.min-saude.pt
Table S1. Epidemiological and clinical data from samples under study: HCV classification, NS5A amino acid substitutions detected using Sanger and NGS sequencing and Genbank and ENA accession numbers. Resistance-associated substitutions (RAS) are highlighted in bold; both NGS frequencies are shown when more than one nucleotide alteration gave rise to the same amino acid.
Sample ID	Year	Country of collection	Age	Sex	Excessive alcohol consumption	Injection Drug Use	Sharing material for injection	Fibroscan	Subtype	Notes	NGS Mean Depth of Coverage	NS5A Substitutions Sanger	NS5A Substitutions NGS	GenBank Accession Number	ENA Accession number	ENA Bioproject
A1-TX187	2015	Portugal: Lisbon	40	M	No	No	-	F0-F1	1a	-	73878.5	No	No	ON506742	ERR10028668	PRJEB55165
A2-TX188	2015	Portugal: Lisbon	45	M	No	No	-	F4	1a	-	66673.4	No	No	ON506743	ERR10028669	PRJEB55165
A3-TX189	2015	Portugal: Lisbon	35	M	-	Yes	Yes	F2	1a	-	69135.6	No	No	ON506744	ERR10028670	PRJEB55165
A4-TX190	2015	Portugal: Lisbon	57	M	No	Yes	Yes	-	1a	-	89660.3	K24K/R	H58P2.4	ON506745	ERR10028671	PRJEB55165
A5-TX191	2015	Portugal: Lisbon	49	M	Yes	Yes	Yes	F3	1b	-	89252.7	No	No	ON506746	ERR10028672	PRJEB55165
A6-TX192	2015	Portugal: Lisbon	45	M	No	Yes	Yes	F2	1a	-	97273.3	K24K/R and H58Q	H58Q64.6	ON506747	ERR10028673	PRJEB55165
A7-TX132	2015	Portugal: Lisbon	38	M	No	Yes	No	F0-F1	1a	-	81259.2	No	No	ON506748	ERR10028674	PRJEB55165
A8-TX194	2015	Portugal: Lisbon	43	M	No	Yes	No	F3	1a	-	80186.9	No	No	ON506749	ERR10028675	PRJEB55165
A9-TX134	2015	Portugal: Lisbon	49	M	Yes	Yes	Yes	F3	1a	-	94764.6	No	M28V22.1	ON506750	ERR10028676	PRJEB55165
A10-TX135	2015	Portugal: Lisbon	39	M	No	Yes	No	F2	3a	-	105520	No	No	ON506751	ERR10028677	PRJEB55165
A11-TX136	2015	Portugal: Lisbon	43	M	Yes	Yes	No	F0-F1	1b	-	81731.2	No	No	ON506752	ERR10028678	PRJEB55165
A12-TX140	2015	Portugal: Lisbon	43	M	Yes	Yes	Yes	F3	1a	-	108403	No	No	ON506753	ERR10028679	PRJEB55165
A13-TX221	2015	Portugal: Lisbon	43	M	-	Yes	Yes	F0-F1	4d	-	96545.2	T58P	T58P99.9	ON506754	ERR10028680	PRJEB55165
A14-TX146	2015	Portugal: Lisbon	39	M	No	No	-	-	1b	-	106780	No	No	ON506755	ERR10028681	PRJEB55165
A15-TX223	2015	Portugal: Lisbon	41	M	Yes	Yes	Yes	F3	1a	-	83254.5	No	No	ON506756	ERR10028682	PRJEB55165
A16-TX147	2015	Portugal: Lisbon	47	M	No	No	-	F0-F1	4a	-	88695.9	No	No	ON506757	ERR10028683	PRJEB55165
A17-TX225	2015	Portugal: Lisbon	31	F	No	Yes	Yes	F3	3a	-	105235	T62I	T62I99.8	ON506758	ERR10028684	PRJEB55165
A18-TX193	2015	Portugal: Lisbon	61	M	No	No	-	F0-F1	4a	-	77767.9	P58L	P58L98.6	ON506759	ERR10028685	PRJEB55165
A19-TX195	2015	Portugal: Lisbon	40	M	Yes	No	-	F0-F1	1a	-	94882.1	K24R	K24R60.9	ON506760	ERR10028686	PRJEB55165
A20-TX214	2015	Portugal: Lisbon	41	M	Yes	Yes	No	F4	1a	-	85978.8	No	No	ON506761	ERR10028687	PRJEB55165
A21-TX218	2015	Portugal: Lisbon	45	M	Yes	Yes	No	F4	3a	-	98764.7	A30T and T62S	A30T81.2 and T62S88.8/S10.7	ON506762	ERR10028688	PRJEB55165
A22-TX144	2015	Portugal: Lisbon	41	M	Yes	Yes	Yes	F0-F1	1a	-	90022.8	No	No	ON506763	ERR10028689	PRJEB55165
A23-TX198	2015	Portugal: Lisbon	29	F	No	Yes	No	F0-F1	1b	-	71515.1	No	No	ON506764	ERR10028690	PRJEB55165
A24-TX139	2015	Portugal: Lisbon	49	M	No	Yes	No	-	1a	-	77798.6	No	No	ON506765	ERR10028691	PRJEB55165
A25-TX199	2015	Portugal: Lisbon	37	M	Yes	Yes	No	F2	1a	-	81114	No	No	ON506766	ERR10028692	PRJEB55165
A26-TX203	2015	Portugal: Lisbon	52	M	Yes	No	-	F4	1a	-	100508	H58H/P	H58P34.4	ON506767	ERR10028693	PRJEB55165
A27-TX215	2015	Portugal: Lisbon	56	M	-	Yes	No	F2	1a	-	103430	No	No	ON506768	ERR10028694	PRJEB55165
A28-TX220	2015	Portugal: Lisbon	41	M	No	Yes	Yes	F0-F1	1a	-	111495	No	No	ON506769	ERR10028695	PRJEB55165
A29-TX224	2015	Portugal: Lisbon	41	M	No	No	-	F0-F1	1a	-	114230	No	No	ON506770	ERR10028696	PRJEB55165
A30-TX149	2015	Portugal: Lisbon	42	M	No	Yes	No	F4	1a	-	107953	L31M and H58P	L31M99.5 and H58P99.9	ON506771	ERR10028697	PRJEB55165
A31-TX151	2015	Portugal: Lisbon	35	M	No	Yes	No	F0-F1	1a	-	116792	No	No	ON506772	ERR10028698	PRJEB55165
A32-TX152	2015	Portugal: Lisbon	40	M	No	Yes	No	F0-F1	3a	-	82742	A30S	A30S99.9	ON506773	ERR10028699	PRJEB55165
A33-TX227	2015	Portugal: Lisbon	46	M	-	Yes	No	F2	1b	-	67612.4	No	No	ON506774	ERR10028700	PRJEB55165
A34-TX228	2015	Portugal: Lisbon	61	M	Yes	Yes	No	F3	1a	-	82491.7	No	M28V3.7	ON506775	ERR10028701	PRJEB55165
A35-TX229	2015	Portugal: Lisbon	39	M	No	Yes	Yes	F0-F1	1a	-	91496.1	No	No	ON506776	ERR10028702	PRJEB55165
A36-TX153	2015	Portugal: Lisbon	39	F	No	Yes	Yes	F0-F1	1a	-	92755.2	No	No	ON506777	ERR10028703	PRJEB55165
A37-TX154	2015	Portugal: Lisbon	42	M	No	Yes	No	F0-F1	4a	-	56861.9	No	No	ON506778	ERR10028704	PRJEB55165
A38-TX230	2015	Portugal: Lisbon	35	M	Yes	Yes	No	F0-F1	3a	-	80295.3	T62S	T62S99.8	ON506779	ERR10028705	PRJEB55165
A39-TX231	2015	Portugal: Lisbon	53	M	No	Yes	No	F0-F1	1b	-	79018	No	No	ON506780	ERR10028706	PRJEB55165
A40-TX156	2015	Portugal: Lisbon	43	F	Yes	No	-	F2	4a	-	101866	No	No	ON506781	ERR10028707	PRJEB55165
A41-TX234	2015	Portugal: Lisbon	49	M	Yes	Yes	Yes	F4	3a	-	91119.9	T62S	T62S98.6	ON506782	ERR10028708	PRJEB55165
A42-TX159	2015	Portugal: Lisbon	36	M	No	Yes	Yes	-	1a	-	55533.8	No	No	ON506783	ERR10028709	PRJEB55165
A43-TX235	2015	Portugal: Lisbon	50	M	No	No	-	F2	3a	-	104015	T62S	T62S99.7	ON506784	ERR10028710	PRJEB55165
A44-TX236	2015	Portugal: Lisbon	35	M	No	Yes	No	F0-F1	1b	-	91489.5	P58S	P58S99.7	ON506785	ERR10028711	PRJEB55165
A45-TX226	2015	Portugal: Lisbon	39	M	No	Yes	Yes	F2	1a	-	70092.9	No	Q30R2.1/H2.3; L31M9.3 and H58R6.7	ON506786	ERR10028712	PRJEB55165
A46-TX237	2015	Portugal: Lisbon	48	M	No	Yes	No	F3	1a	-	76789.7	No	No	ON506787	ERR10028713	PRJEB55165
A47-TX238	2015	Portugal: Lisbon	47	M	Yes	Yes	Yes	F2	1a	-	109603	No	No	ON506788	ERR10028714	PRJEB55165
A48-TX239	2015	Portugal: Lisbon	41	M	Yes	Yes	Yes	F0-F1	1a	-	97133.7	No	H58Q19.3	ON506789	ERR10028715	PRJEB55165
A49-TX241	2015	Portugal: Lisbon	49	M	No	Yes	Yes	F4	3a	-	95251.1	T62S	T62S99.4	ON506790	ERR10028716	PRJEB55165
A50-TX243	2015	Portugal: Lisbon	40	M	No	Yes	No	F2	1b	-	83272	No	No	ON506791	ERR10028717	PRJEB55165
A51-TX172	2015	Portugal: Lisbon	42	M	No	Yes	No	Inconclusive	1a	-	108930	No	H58D2.6/P1.2	ON506792	ERR10028718	PRJEB55165
A52-TX245	2015	Portugal: Lisbon	45	M	Yes	Yes	Yes	F4	4d	-	94419.7	T58P	T58P99.8	ON506793	ERR10028719	PRJEB55165
A53-TX197	2015	Portugal: Lisbon	36	M	-	Yes	No	F2	3a	-	82974.1	T62H	T62H97.7 and Y93H2.0	ON506794	ERR10028720	PRJEB55165
A54-TX219	2015	Portugal: Lisbon	42	M	Yes	Yes	Yes	F3	1a	-	91265.3	H58R	H58R97.8	ON506795	ERR10028721	PRJEB55165
A55-TX157	2015	Portugal: Lisbon	38	M	No	Yes	No	F2	4a	-	75114	No	No	ON506796	ERR10028722	PRJEB55165
A56-TX232	2015	Portugal: Lisbon	51	F	-	No	-	F0-F1	1a	-	93730.8	No	M28V2.9 and L31M1.4	ON506797	ERR10028723	PRJEB55165
A57-TX158	2015	Portugal: Lisbon	50	M	No	Yes	No	F0-F1	3a	-	80032.8	T62S	T62S99.1	ON506798	ERR10028724	PRJEB55165
A58-TX233	2015	Portugal: Lisbon	37	M	No	No	-	F0-F1	4d	-	110408	T58P	T58P99.9	ON506799	ERR10028725	PRJEB55165
A59-TX240	2015	Portugal: Lisbon	44	F	No	Yes	No	F0-F1	3a	-	117044	T62S	T62S99.6	ON506800	ERR10028726	PRJEB55165
A60-TX244	2015	Portugal: Lisbon	44	F	No	Yes	Yes	-	4a	-	90943.4	No	No	ON506801	ERR10028727	PRJEB55165
A61-TX178	2015	Portugal: Lisbon	36	M	Yes	Yes	No	F0-F1	2k/1b	Recombinant form	88381.8	L31M	L31M99.7	ON506802	ERR10028728	PRJEB55165
A62-TX196	2015	Portugal: Lisbon	45	M	-	Yes	No	F0-F1	1a	-	102929	No	No	ON506803	ERR10028729	PRJEB55165
A63-TX201	2015	Portugal: Lisbon	55	M	No	Yes	Yes	F0-F1	1a	-	90019.3	No	No	ON506804	ERR10028730	PRJEB55165
A64-TX202	2015	Portugal: Lisbon	39	M	Yes	Yes	No	-	3a	-	102639	T62S	T62S99.7	ON506805	ERR10028731	PRJEB55165
A65-TX204	2015	Portugal: Lisbon	59	M	Yes	Yes	No	F4	1b	-	89934.9	No	No	ON506806	ERR10028732	PRJEB55165
A66-TX242	2015	Portugal: Lisbon	56	M	Yes	Yes	No	F4	1a	-	74740	No	No	ON506807	ERR10028733	PRJEB55165
A67-TX246	2015	Portugal: Lisbon	48	M	No	Yes	No	F2	4d	-	98797.4	T58T/P	T58P45.4	ON506808	ERR10028734	PRJEB55165
A68-TX205	2015	Portugal: Lisbon	50	M	No	Yes	Yes	F0-F1	1a	-	69115.6	No	No	ON506809	ERR10028735	PRJEB55165
A69-TX207	2015	Portugal: Lisbon	42	M	No	Yes	Yes	F4	3a	-	100797	No	No	ON506810	ERR10028736	PRJEB55165
A70-TX208	2015	Portugal: Lisbon	35	M	No	Yes	Yes	F0-F1	1a	-	112497	Q30H	Q30H46.3	ON506811	ERR10028737	PRJEB55165
A71-TX209	2015	Portugal: Lisbon	39	M	No	No	-	F0-F1	1a	-	104965	No	No	ON506812	ERR10028738	PRJEB55165
A72-TX210	2015	Portugal: Lisbon	45	M	Yes	Yes	Yes	F0-F1	3a	-	113246	No	No	ON506813	ERR10028739	PRJEB55165
A73-TX211	2015	Portugal: Lisbon	44	M	No	Yes	Yes	-	1a	Mixed infection	86286.4	No	No	ON506814	ERR10028740	PRJEB55165
									3a		105.2	No	T62V88.7	OP179320
A74-TX141	2015	Portugal: Lisbon	53	F	Yes	Yes	No	F0-F1	3a	-	96991.4	T62S	T62S99.8	ON506815	ERR10028741	PRJEB55165
A75-TX212	2015	Portugal: Lisbon	41	M	No	Yes	Yes	-	1a	-	91855.4	No	No	ON506816	ERR10028742	PRJEB55165
A76-TX213	2015	Portugal: Lisbon	41	M	Yes	Yes	No	-	4d	-	98191.5	T58P	T58P99.9	ON506817	ERR10028743	PRJEB55165
A77-TX216	2015	Portugal: Lisbon	39	M	Yes	Yes	No	F0-F1	4a	-	86787.1	No	No	ON506818	ERR10028744	PRJEB55165
A78-TX217	2015	Portugal: Lisbon	42	M	No	Yes	No	F3	4d	-	89508.1	T58P	T58P88.2/P11.6	ON506819	ERR10028745	PRJEB55165
A79-TX145	2015	Portugal: Lisbon	41	M	No	Yes	No	-	1a	-	86232.5	No	No	ON506820	ERR10028746	PRJEB55165
A80-TX222	2015	Portugal: Lisbon	39	M	Yes	Yes	Yes	F2	1a	-	78036.2	No	No	ON506821	ERR10028747	PRJEB55165
A81-TX148	2015	Portugal: Lisbon	34	M	Yes	No	-	F3	3a	-	99164.8	No	No	ON506822	ERR10028748	PRJEB55165
A82-TX150	2015	Portugal: Lisbon	38	F	No	Yes	Yes	F0-F1	1a	-	109608	No	No	ON506823	ERR10028749	PRJEB55165
A83-TX200	2015	Portugal: Lisbon	50	M	-	Yes	Yes	F4	1a	-	74089.7	No	No	ON506824	ERR10028750	PRJEB55165
A84-TX206	2015	Portugal: Lisbon	50	M	No	No	-	F4	3a	-	93324.2	T62P	T62P99.3	ON506825	ERR10028751	PRJEB55165
Excluded 1	2015	Portugal: Lisbon	46	M	Yes	Yes	Yes	F2	-	-	-	-	-	-	-	-
Excluded 2	2015	Portugal: Lisbon	45	M	No	No	-	-	-	-	-	-	-	-	-	-
Excluded 3	2015	Portugal: Lisbon	52	M	Yes	Yes	No	F2	-	-	-	-	-	-	-	-
Excluded 4	2015	Portugal: Lisbon	53	M	Yes	Yes	No	F0-F1	-	-	-	-	-	-	-	-
Excluded 5	2015	Portugal: Lisbon	47	F	No	No	-	F0-F1	-	-	-	-	-	-	-	-
Excluded 6	2015	Portugal: Lisbon	58	M	No	Yes	No	F0-F1	-	-	-	-	-	-	-	-
